# Supplementary material for: A mechanistic study of thiol addition to N-phenylacrylamide
Source: Royal Society of Chemistry journal article supplement (doi:10.1039/d2ob01369j), 2022-01-01
Supplement: d2ob01369j1.pdf [file d2ob01369j1.pdf]

# **A mechanistic study of thiol addition to N-phenylacrylamide, relating reactivity to thiol $pK_a$**

Sarah K. I. Watt<sup>a</sup>, Janique G. Charlebois<sup>a</sup>, Christopher N. Rowley<sup>b</sup>, Jeffrey W. Keillor<sup>a\*</sup>

<sup>a</sup>Department of Chemistry and Biomolecular Sciences, University of Ottawa

Ottawa, Canada

<sup>b</sup> Department of Chemistry, Carleton University,

Ottawa, Canada

**\*Corresponding author:** [jkeillor@uottawa.ca](mailto:jkeillor@uottawa.ca)

| <b>Table of Contents</b>                                                                                                                           | <b>Page</b> |
|----------------------------------------------------------------------------------------------------------------------------------------------------|-------------|
| <b>Table S1:</b> $k_{\text{obs}}$ , $k_2^{\text{calc}}$ , and $k_2^{\text{corr}}$ values for addition of RSH (1a-e) to NPA                         | S3          |
| <b>Figure S1-5:</b> Plots of $k_{\text{obs}}$ for addition of RSH (1a-e) to NPA                                                                    | S3          |
| <b>Table S2:</b> $k_{\text{obs}}$ , $k_2^{\text{calc}}$ , and $k_2^{\text{corr}}$ values for addition of RSH (1a-e) to NPA                         | S6          |
| <b>Figure S6:</b> Fitting of pH rate profile for addition of DEC (1a) to NPA                                                                       | S7          |
| <b>Figures S7-10:</b> Plots of $k_{\text{obs}}$ for addition of DEC (1a) to NPA at varied pH                                                       | S7          |
| <b>Table S3:</b> $k_{\text{obs}}$ , $k_2^{\text{calc}}$ , and $k_2^{\text{corr}}$ values for addition of DEC (1a) to NPA at varied pH              | S9          |
| <b>Figures S11-13:</b> Plots of $k_{\text{obs}}$ for addition of MPA (1e) to NPA at varied temperatures                                            | S10         |
| <b>Figure S14:</b> Fitting of Arrhenius plot for addition of MPA (1e) to NPA                                                                       | S11         |
| <b>Figure S15:</b> Fitting of Eyring plot for addition of MPA (1e) to NPA                                                                          | S12         |
| <b>Table S4:</b> $k_{\text{obs}}$ , $k_2^{\text{calc}}$ , and $k_2^{\text{corr}}$ values for addition of MPA (1e) to NPA at varied temperatures    | S12         |
| <b>Figures S16-17:</b> Plots of $k_{\text{obs}}$ for addition of MPA (1e) to NPA at varied ionic strengths                                         | S13         |
| <b>Table S5:</b> $k_{\text{obs}}$ , $k_2^{\text{calc}}$ , and $k_2^{\text{corr}}$ values for addition of DEC (1a) to NPA at varied ionic strengths | S14         |
| <b>Figure S18:</b> Plots of $k_{\text{obs}}$ for addition of RSH (1a-e) to NPA                                                                     | S15         |
| <b>Table S6:</b> $k_{\text{obs}}$ , $k_2^{\text{calc}}$ , and $k_2^{\text{corr}}$ values for addition of DEC (1a) to NPA at various pH             | S15         |
| <b>Figure S19:</b> $^1\text{H-NMR}$ spectrum of NPA + MPA adduct                                                                                   | S16         |
| <b>Figure S20:</b> COSY spectrum of NPA + MPA adduct                                                                                               | S18         |
| <b>Table S7:</b> DFT Coordinates                                                                                                                   | S19         |

**Table S1.** pH of buffer, mobile phase gradient, length of run and retention times of NPA and thiol-adduct for each experiment of NPA with RSH (1a-e).

| Thiol | pH of Aqueous Buffer | Mobile Phase Gradient (% CH <sub>3</sub> CN in H <sub>2</sub> O) | Total Length of Run (min) | Retention Time NPA (min) | Retention Time Adduct (min) |
|-------|----------------------|------------------------------------------------------------------|---------------------------|--------------------------|-----------------------------|
| 1a    | 7.4                  | 20-80                                                            | 15                        | 7.9                      | 5.7                         |
| 1b    | 7.4                  | 20-80                                                            | 15                        | 7.6                      | 3.3                         |
| 1c    | 7.4                  | 20-80                                                            | 15                        | 7.9                      | 3.4                         |
| 1d    | 9.0                  | 20-80                                                            | 15                        | 7.6                      | 6.4                         |
| 1e    | 9.0                  | 20-50                                                            | 20                        | 8.7                      | 9.9                         |

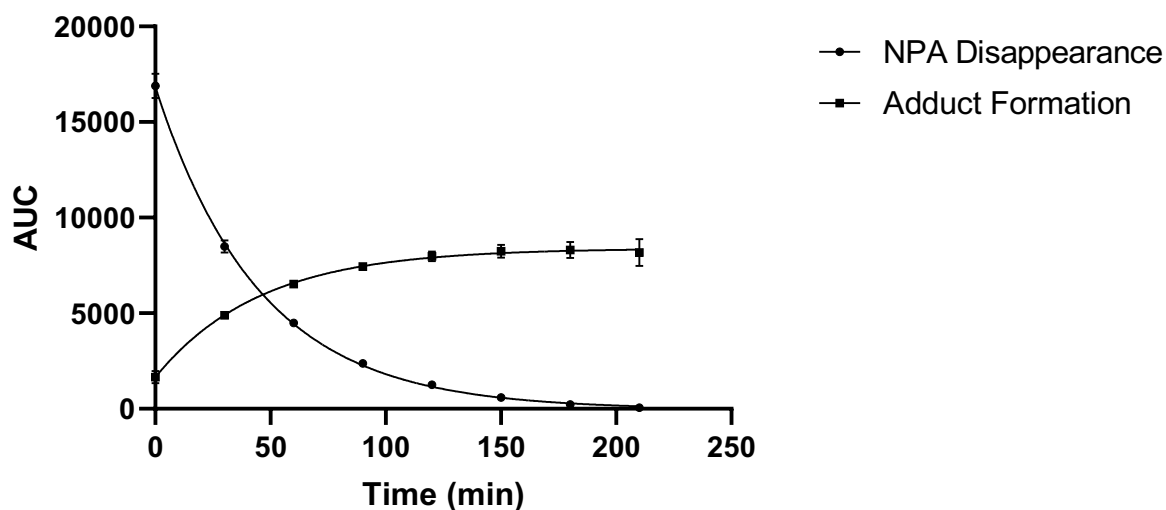

**Figure S1.** Plot of disappearance of NPA (1mM) and formation of adduct for the addition of DEC (10 mM) vs time (min) in 67 mM potassium phosphate buffer (1% v/v DMSO), pH 7.4,  $\mu = 0.100$ ,  $T = 22^\circ\text{C}$ . The area under the curve (AUC) was integrated from the chromatograph at 214 nm for the peaks corresponding to NPA and the adduct. The AUC data for disappearance of NPA were fitted to a mono-exponential decay with the constraint that the plateau = 0 and the data for formation of adduct were fitted to a mono-exponential association to afford the  $k_{\text{obs}}$  values summarized in **Table S1**.

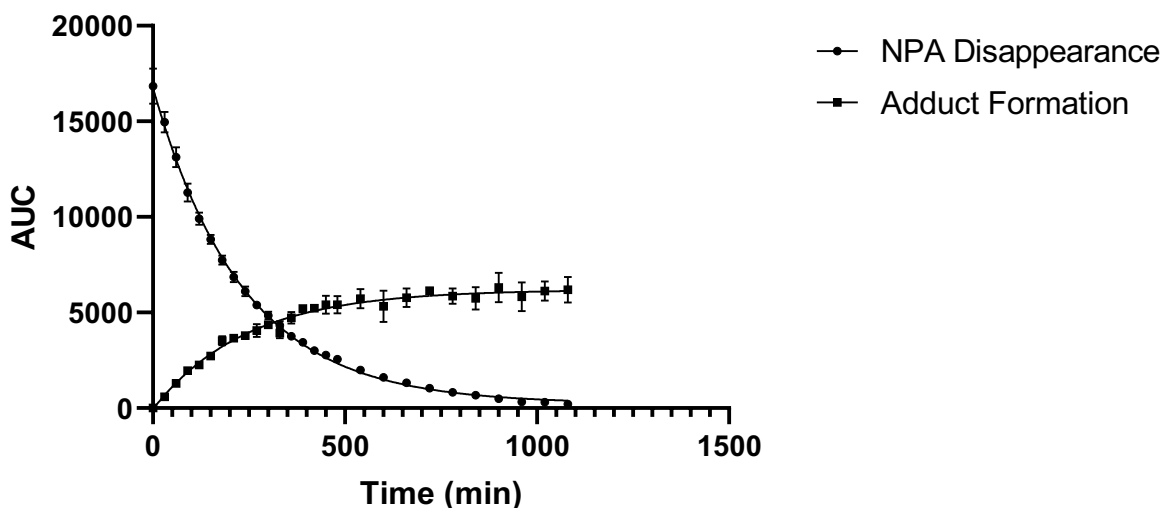

**Figure S2.** Plot of disappearance of NPA (1 mM) and formation of adduct for the addition of Cys (10 mM) vs time (min) in 67 mM potassium phosphate buffer (1% v/v DMSO), pH 7.4,  $\mu = 0.100$ ,  $T = 22^\circ\text{C}$ . The area under the curve (AUC) was integrated from the chromatograph at 214 nm for the peaks corresponding to NPA and the adduct. The AUC data for disappearance of NPA were fitted to a mono-exponential decay with the constraint that the plateau = 0 and the data for formation of adduct were fitted to a mono-exponential association with the constraint that  $Y_0 = 0$  to afford the  $k_{\text{obs}}$  values summarized in **Table S1**.

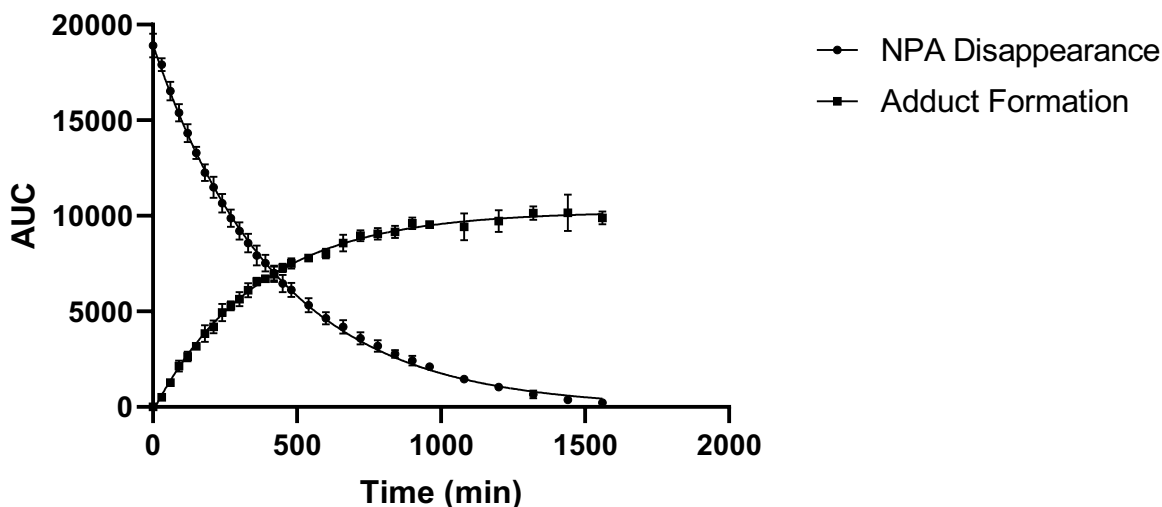

**Figure S3.** Plot of disappearance of NPA (1 mM) and formation of adduct for the addition of GSH (10 mM) vs time (min) in 67 mM potassium phosphate buffer (1% v/v DMSO), pH 7.4,  $\mu = 0.100$ ,  $T = 22^\circ\text{C}$ . The area under the curve (AUC) was integrated from the chromatograph at 214 nm for the peaks corresponding to NPA and the adduct. The AUC data for disappearance of NPA were fitted to a mono-exponential decay with the constraint that the plateau = 0 and the data for formation of adduct were fitted to a mono-exponential association with the constraint that  $Y_0 = 0$  to afford the  $k_{\text{obs}}$  values summarized in **Table S1**.

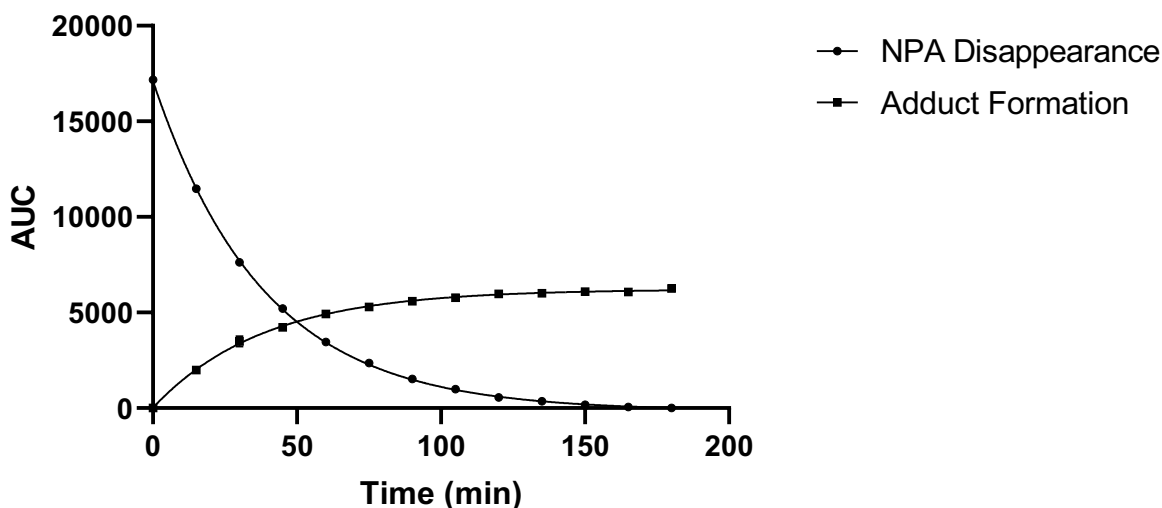

**Figure S4.** Plot of disappearance of NPA (1 mM) and formation of adduct for the addition of BME (10 mM) vs time (min) in 67 mM CHES buffer (1% v/v DMSO), pH 9,  $\mu = 0.100$ ,  $T = 22^\circ\text{C}$ . The area under the curve (AUC) was integrated from the chromatograph at 214 nm for the peaks corresponding to NPA and the adduct. The AUC data for disappearance of NPA were fitted to a mono-exponential decay with the constraint that the plateau = 0 and the data for formation of adduct were fitted to a mono-exponential association with the constraint that  $Y_0 = 0$  to afford the  $k_{\text{obs}}$  values summarized in **Table S1**.

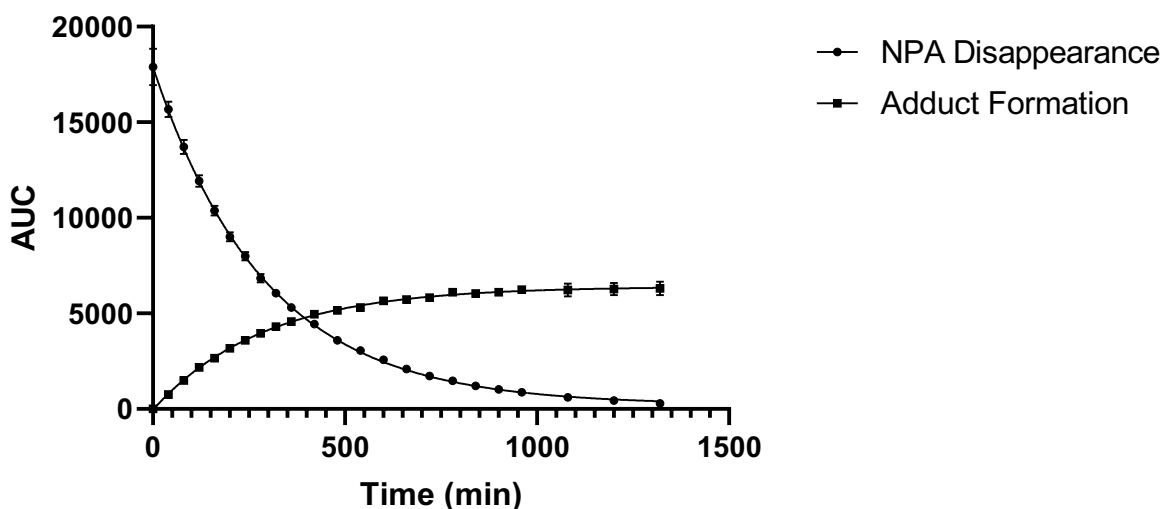

**Figure S5.** Plot of disappearance of NPA (1 mM) and formation of adduct for the addition of MPA (10 mM) vs time (min) in 67 mM CHES buffer (1% v/v DMSO), pH 9,  $\mu = 0.100$ ,  $T = 22^\circ\text{C}$ . The area under the curve (AUC) was integrated from the chromatograph at 214 nm for the peaks corresponding to NPA and the adduct. The AUC data for disappearance of NPA were fitted to a mono-exponential decay with the constraint that the plateau = 0 and the data for formation of adduct were fitted to a mono-exponential association with the constraint that  $Y_0 = 0$  to afford the  $k_{\text{obs}}$  values summarized in **Table S1**.

**Table S2.** Observed rate constants ( $k_{\text{obs}}$ ), calculated second order rate constants ( $k_2^{\text{calc}}$ ), and corrected second order rate constants ( $k_2^{\text{corr}}$ ) for the addition of RSH (**1a-e**) to NPA. Measurements were made in duplicate for both the disappearance of acrylamide and appearance of adduct, unless otherwise indicated. Errors represent the standard deviation of the replicate values.

| Thiol | $k_{\text{obs}} \text{ (s}^{-1}\text{)}$ | $k_2^{\text{calc}} \text{ (M}^{-1}\text{s}^{-1}\text{)}$ | $k_2^{\text{corr}} \text{ (M}^{-1}\text{s}^{-1}\text{)}$ | $\log(k_2^{\text{corr}})$ |
|-------|------------------------------------------|----------------------------------------------------------|----------------------------------------------------------|---------------------------|
| 1a    | $0.37 \pm 0.03^a$                        | $0.037 \pm 0.003$                                        | $0.13 \pm 0.01$                                          | $-0.887 \pm 0.036$        |
| 1b    | $0.068 \pm 0.007$                        | $0.0068 \pm 0.0007$                                      | $0.061 \pm 0.006$                                        | $-1.214 \pm 0.043$        |
| 1c    | $0.041 \pm 0.002^b$                      | $0.0041 \pm 0.0002$                                      | $0.086 \pm 0.005$                                        | $-1.064 \pm 0.024$        |
| 1d    | $0.44 \pm 0.02$                          | $0.044 \pm 0.002$                                        | $0.220 \pm 0.008$                                        | $-0.657 \pm 0.016$        |
| 1e    | $0.056 \pm 0.002$                        | $0.0056 \pm 0.0002$                                      | $0.118 \pm 0.004$                                        | $-0.929 \pm 0.013$        |

<sup>a</sup>Measurements made in triplicate. <sup>b</sup>Measurements made in quadruplet.

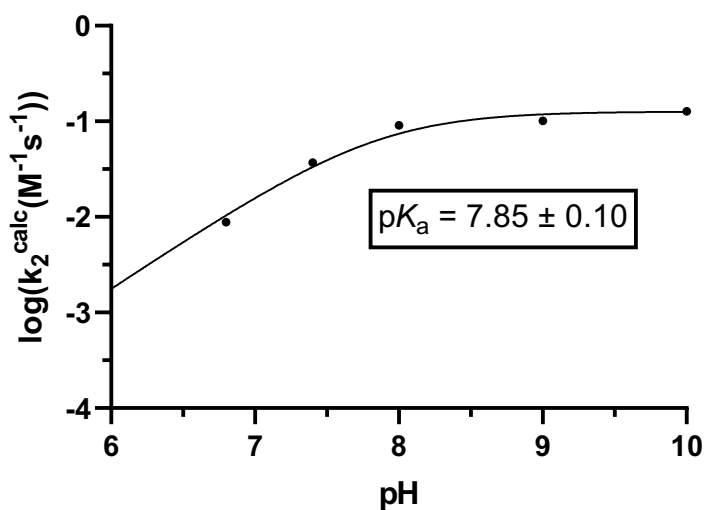

**Figure S6.** Plot of  $\log(k_2^{\text{calc}})$  vs pH for the addition of 1a to NPA in aqueous buffer (1% v/v DMSO),  $\mu = 0.100$ ,  $T = 22^\circ\text{C}$ . The data were fitted to the eq 1, giving a kinetic  $pK_a$  value of  $7.85 \pm 0.10$ .

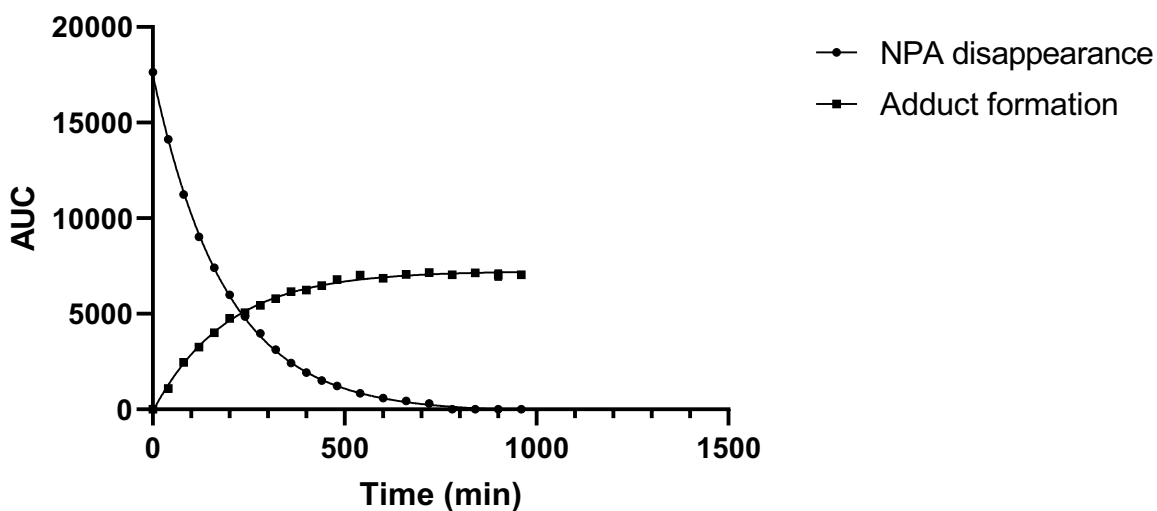

**Figure S7.** Plot of disappearance of NPA (1 mM) and formation of adduct for the addition of 1a (10 mM) vs time (min) in 67 mM MOPS buffer (1% v/v DMSO) at pH 6.8,  $\mu = 0.100$ ,  $T = 22^\circ\text{C}$ . The area under the curve (AUC) was integrated from the chromatograph at 214 nm for the peaks corresponding to NPA and the adduct. The AUC data for disappearance of NPA were fitted to a mono-exponential decay with the constraint that the plateau = 0 and the data for formation of adduct were fitted to a mono-exponential association with the constraint that  $Y_0 = 0$  to afford the  $k_{\text{obs}}$  values summarized in **Table S2**.

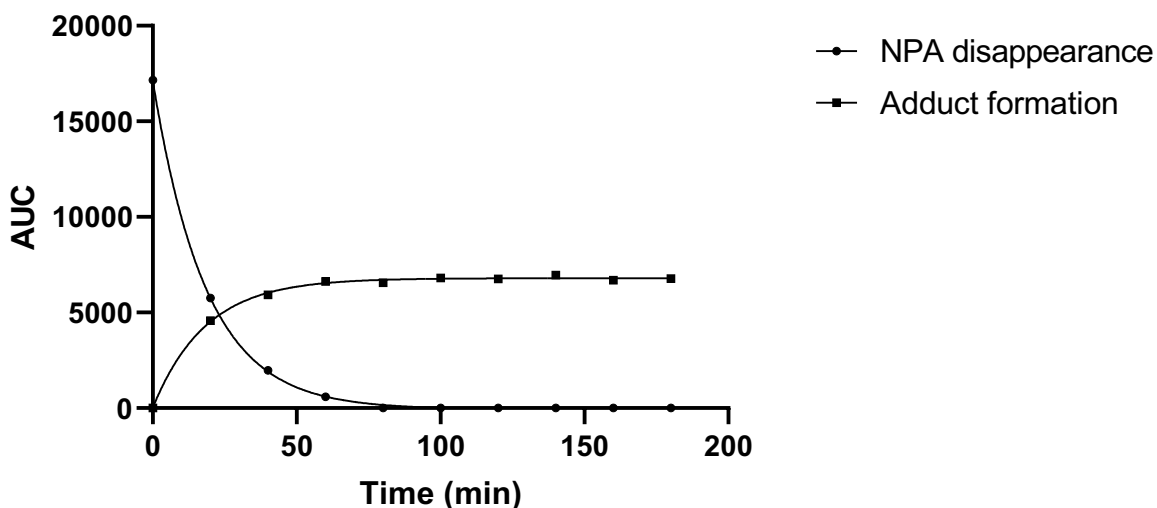

**Figure S8.** Plot of disappearance of NPA (1 mM) and formation of adduct for the addition of 1a (10 mM) vs time (min) in 67 mM TRIS buffer (1% v/v DMSO) at pH 8.0,  $\mu = 0.100$ ,  $T = 22^\circ\text{C}$ . The area under the curve (AUC) was integrated from the chromatograph at 214 nm for the peaks corresponding to NPA and the adduct. The AUC data for disappearance of NPA were fitted to a mono-exponential decay with the constraint that the plateau = 0 and the data for formation of adduct were fitted to a mono-exponential association with the constraint that  $Y_0 = 0$  to afford the  $k_{\text{obs}}$  values summarized in **Table S2**.

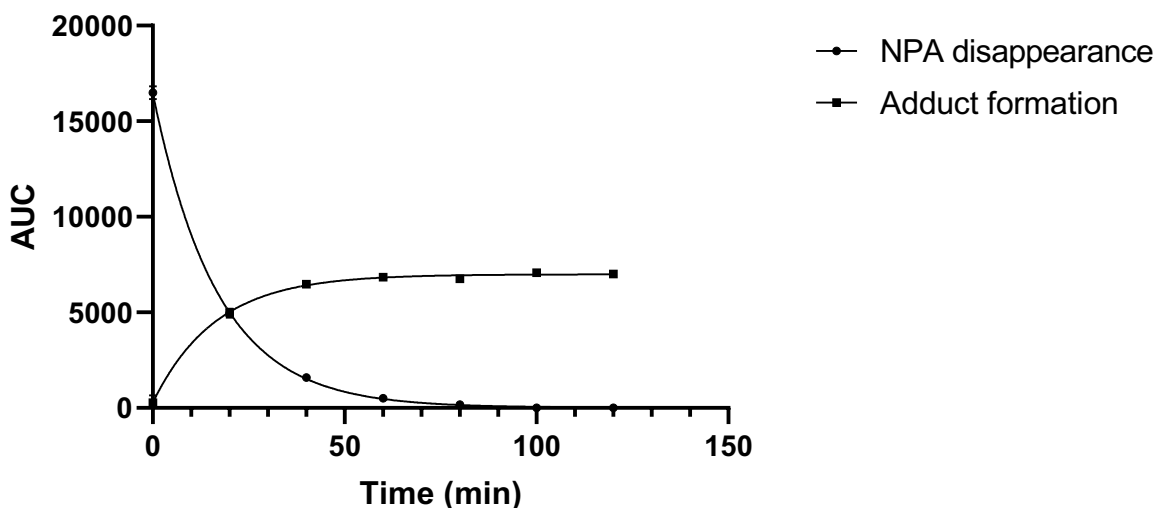

**Figure S9.** Plot of disappearance of NPA (1 mM) and formation of adduct for the addition of 1a (10 mM) vs time (min) in 67 mM CHES buffer (1% v/v DMSO) at pH 9.0,  $\mu = 0.100$ ,  $T = 22^\circ\text{C}$ . The area under the curve (AUC) was integrated from the chromatograph at 214 nm for the peaks corresponding to NPA and the adduct. The AUC data for disappearance of NPA were fitted to a mono-exponential decay with the constraint that the plateau = 0 and the data for formation of adduct were fitted to a mono-exponential association with the constraint that  $Y_0 = 0$  to afford the  $k_{\text{obs}}$  values summarized in **Table S2**.



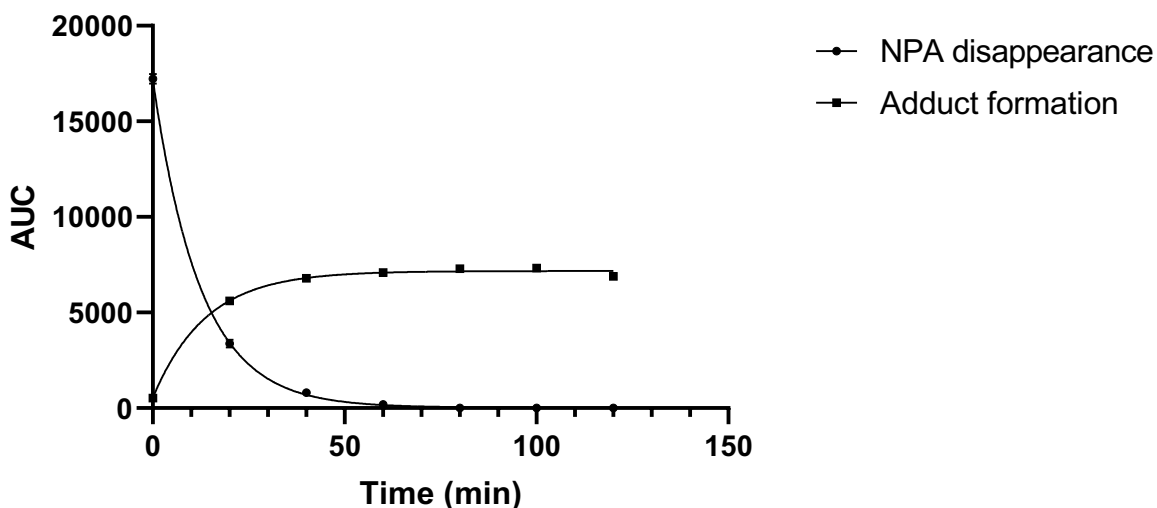

**Figure S10.** Plot of disappearance of NPA (1 mM) and formation of adduct for the addition of 1a (10 mM) vs time (min) in 67 mM CAPS buffer (1% v/v DMSO) at pH 10.0,  $\mu = 0.100$ ,  $T = 22^\circ\text{C}$ . The area under the curve (AUC) was integrated from the chromatograph at 214 nm for the peaks corresponding to NPA and the adduct. The AUC data for disappearance of NPA were fitted to a mono-exponential decay with the constraint that the plateau = 0 and the data for formation of adduct were fitted to a mono-exponential association with the constraint that  $Y_0 = 0$  to afford the  $k_{\text{obs}}$  values summarized in **Table S2**.

**Table S3.** Observed rate constants ( $k_{\text{obs}}$ ) and calculated second order rate constants ( $k_2^{\text{calc}}$ ) for the addition of RSH (**1a**) to NPA at variable pH. Measurements were made in duplicate for both the disappearance of acrylamide and appearance of adduct. Errors represent the standard deviation of the replicate values.

| pH   | $k_{\text{obs}} (\text{s}^{-1})$ | $k_2^{\text{calc}} (\text{M}^{-1}\text{s}^{-1})$ | $\log(k_2^{\text{calc}})$ |
|------|----------------------------------|--------------------------------------------------|---------------------------|
| 6.8  | $0.088 \pm 0.004$                | $0.0088 \pm 0.0004$                              | $-2.056 \pm 0.020$        |
| 7.4  | $0.369 \pm 0.032$                | $0.0369 \pm 0.0032$                              | $-1.433 \pm 0.036$        |
| 8.0  | $0.908 \pm 0.033$                | $0.0908 \pm 0.0033$                              | $-1.042 \pm 0.016$        |
| 9.0  | $1.010 \pm 0.044$                | $0.1010 \pm 0.0044$                              | $-0.996 \pm 0.019$        |
| 10.0 | $1.280 \pm 0.085$                | $0.1280 \pm 0.0085$                              | $-0.894 \pm 0.029$        |

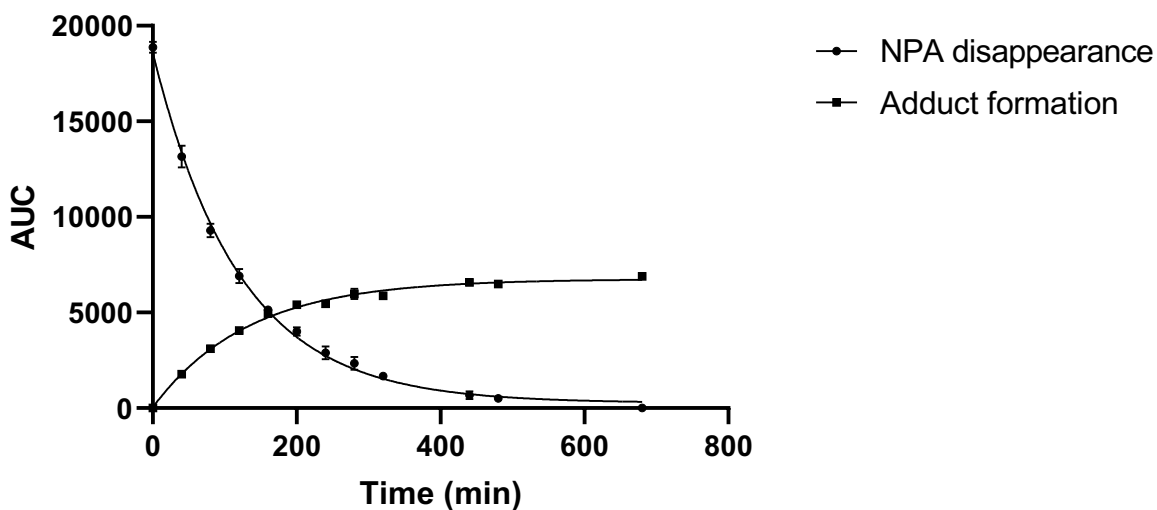

**Figure S11.** Plot of disappearance of NPA (1 mM) and formation of adduct for the addition of 1e (10 mM) vs time (min) in 67 mM CHES buffer (1% v/v DMSO) at pH 9.0,  $\mu = 0.100$ ,  $T = 37^\circ\text{C}$ . The area under the curve (AUC) was integrated from the chromatograph at 214 nm for the peaks corresponding to NPA and the adduct. The AUC data for disappearance of NPA were fitted to a mono-exponential decay with the constraint that the plateau = 0 and the data for formation of adduct were fitted to a mono-exponential association with the constraint that  $Y_0 = 0$  to afford the  $k_{\text{obs}}$  values summarized in **Table S3**.

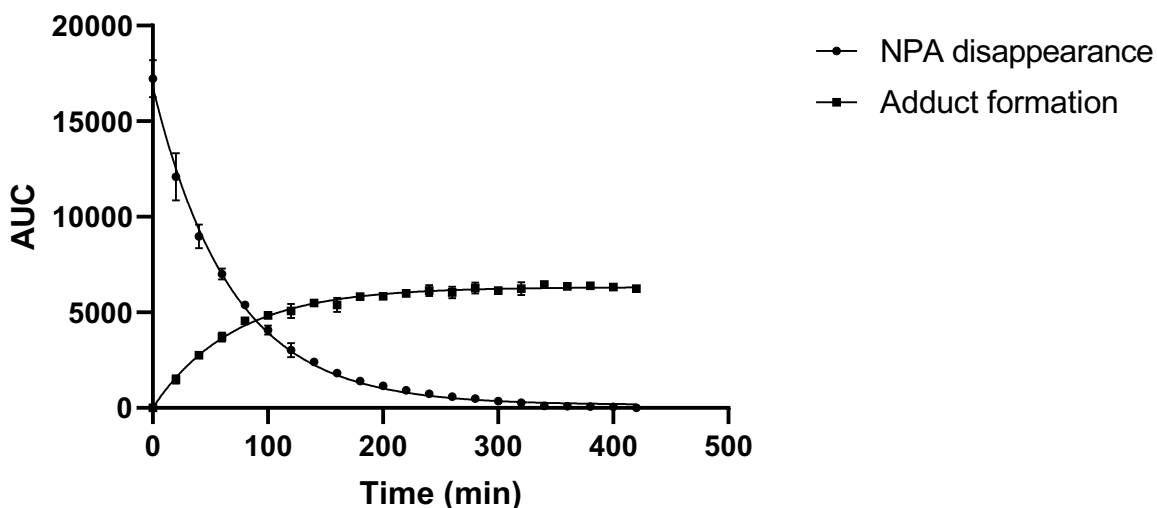

**Figure S12.** Plot of disappearance of NPA (1 mM) and formation of adduct for the addition of 1e (10 mM) vs time (min) in 67 mM CHES buffer (1% v/v DMSO) at pH 9.0,  $\mu = 0.100$ ,  $T = 53^\circ\text{C}$ . The area under the curve (AUC) was integrated from the chromatograph at 214 nm for the peaks corresponding to NPA and the adduct. The AUC data for disappearance of NPA were fitted to a mono-exponential decay with the constraint that the plateau = 0 and the data for formation of adduct were fitted to a mono-exponential association with the constraint that  $Y_0 = 0$  to afford the  $k_{\text{obs}}$  values summarized in **Table S3**.

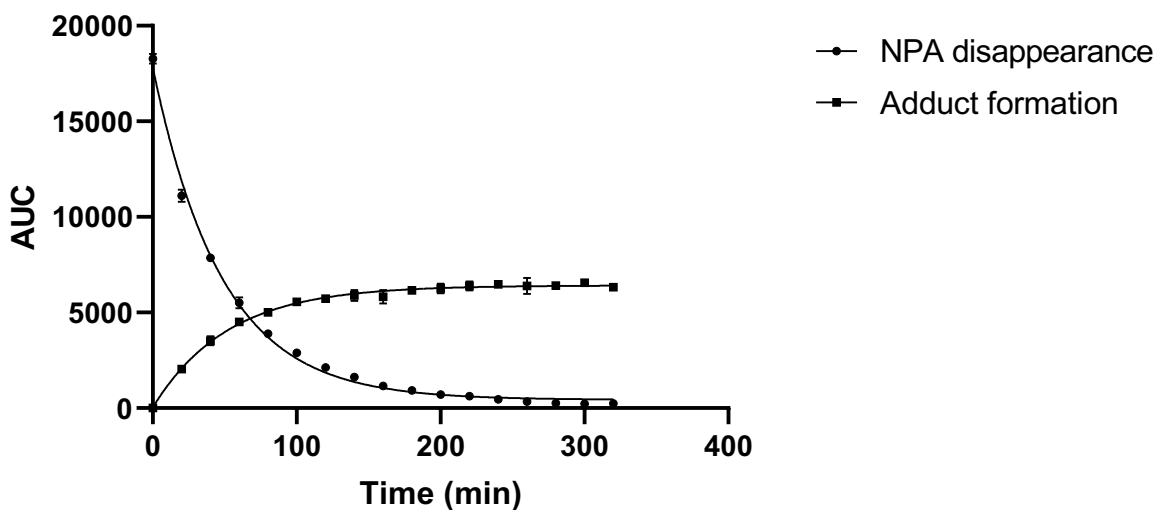

**Figure S13.** Plot of disappearance of NPA (1 mM) and formation of adduct for the addition of 1e (10 mM) vs time (min) in 67 mM CHES buffer (1% v/v DMSO) at pH 9.0,  $\mu = 0.100$ ,  $T = 62^\circ\text{C}$ . The area under the curve (AUC) was integrated from the chromatograph at 214 nm for the peaks corresponding to NPA and the adduct. The AUC data for disappearance of NPA were fitted to a mono-exponential decay with the constraint that the plateau = 0 and the data for formation of adduct were fitted to a mono-exponential association with the constraint that  $Y_0 = 0$  to afford the  $k_{\text{obs}}$  values summarized in **Table S3**.

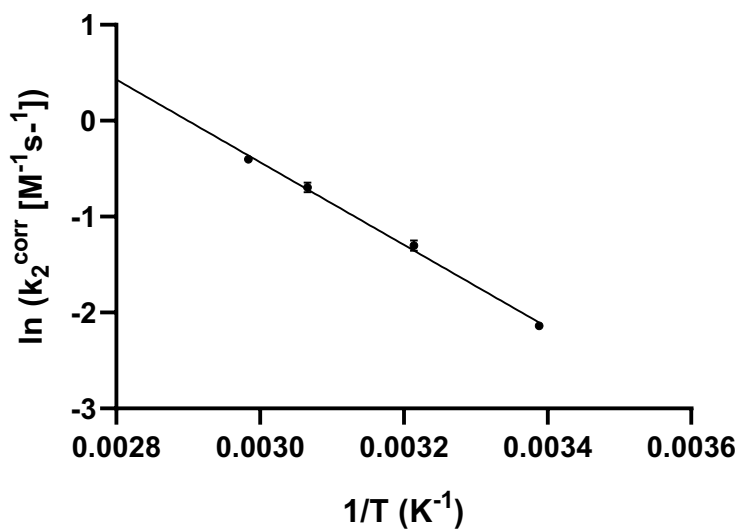

**Figure S14.** Arrhenius plot showing  $\ln(k_2^{\text{corr}})$  vs  $1/T$  for the addition of 1e to NPA in 67 mM CHES buffer (1% v/v DMSO), pH = 9.0,  $\mu = 0.100$ . The data were fitted to a linear regression to obtain a slope of  $-4308 \pm 173.3$  and y-intercept of  $12.49 \pm 0.55$ .

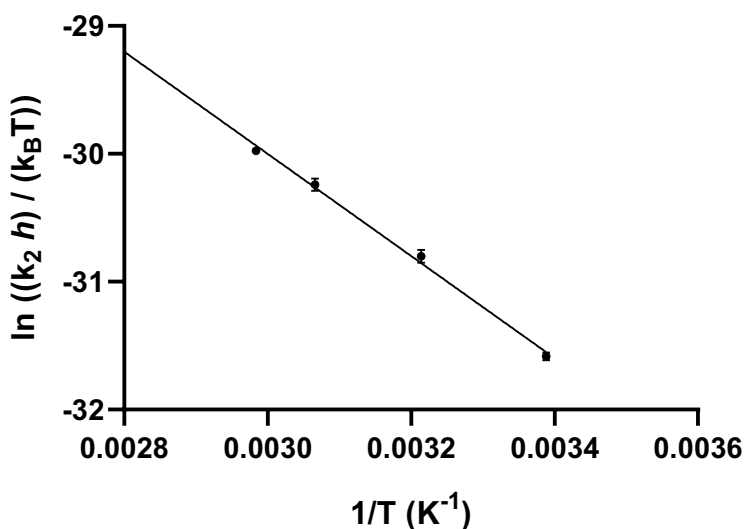

**Figure S15.** Eyring plot showing  $\ln((k_2h)/(k_B T))$  vs  $1/T$  for the addition of **1e** to NPA in 67 mM CHES buffer (1% v/v DMSO), pH = 9.0,  $\mu = 0.100$ . The data were fitted to a linear regression to obtain a slope of  $-3994 \pm 177.2$  and y-intercept of  $-18.02 \pm 0.56$ .

**Table S4.** Observed rate constants ( $k_{\text{obs}}$ ), calculated second order rate constants ( $k_2^{\text{calc}}$ ), and corrected second order rate constants ( $k_2^{\text{corr}}$ ) for the addition of MPA (**1e**) to NPA at variable temperatures. Measurements were made in duplicate for both the disappearance of acrylamide and appearance of adduct. Errors represent the standard deviation of the replicate values.

| Temp (°C) | $k_{\text{obs}}$ (s <sup>-1</sup> ) | $k_2^{\text{calc}}$ (M <sup>-1</sup> s <sup>-1</sup> ) | $k_2^{\text{corr}}$ (M <sup>-1</sup> s <sup>-1</sup> ) | ln( $k_2^{\text{corr}}$ ) | ln(( $k_2^{\text{corr}}h$ )/ $k_B T$ ) |
|-----------|-------------------------------------|--------------------------------------------------------|--------------------------------------------------------|---------------------------|----------------------------------------|
| 22        | 0.056 ± 0.002                       | 0.0056 ± 0.0002                                        | 0.118 ± 0.004                                          | -2.137 ± 0.029            | -31.584 ± 0.031                        |
| 38        | 0.130 ± 0.007                       | 0.013 ± 0.0007                                         | 0.272 ± 0.015                                          | -1.302 ± 0.053            | -30.802 ± 0.050                        |
| 52        | 0.238 ± 0.012                       | 0.024 ± 0.001                                          | 0.499 ± 0.025                                          | -0.695 ± 0.050            | -30.242 ± 0.050                        |
| 63        | 0.320 ± 0.007                       | 0.032 ± 0.0006                                         | 0.670 ± 0.014                                          | -0.401 ± 0.021            | -29.975 ± 0.021                        |

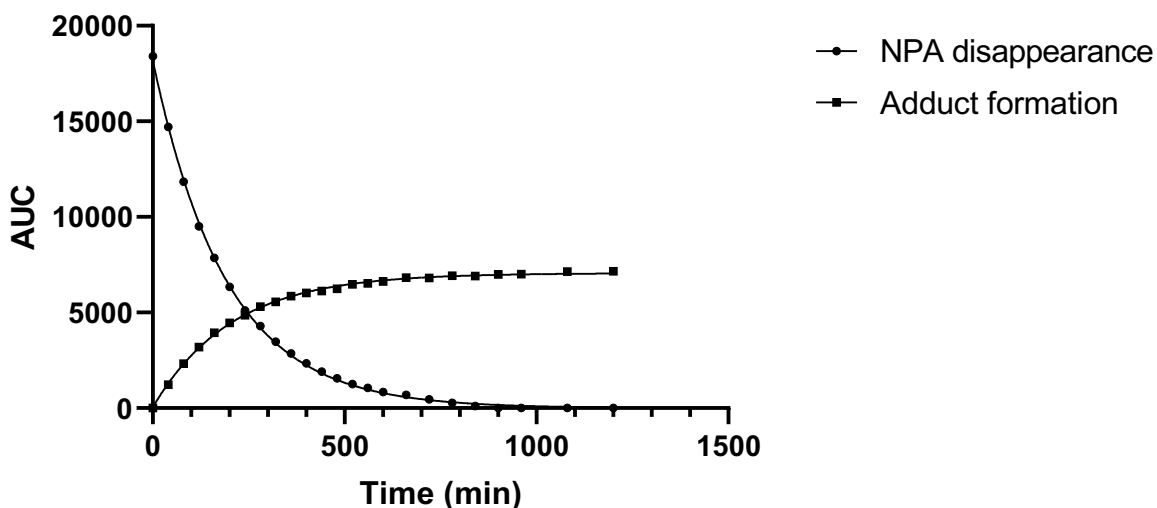

**Figure S16.** Plot of disappearance of NPA (1 mM) and formation of adduct for the addition of 1e (10 mM) vs time (min) in 67 mM CHES buffer (1% v/v DMSO), pH 9.0,  $\mu = 0.050$ ,  $T = 22^\circ\text{C}$ . The area under the curve (AUC) was integrated from the chromatograph at 214 nm for the peaks corresponding to NPA and the adduct. The AUC data for disappearance of NPA were fitted to a mono-exponential decay with the constraint that the plateau = 0 and the data for formation of adduct were fitted to a mono-exponential association with the constraint that  $Y_0 = 0$  to afford the  $k_{\text{obs}}$  values summarized in **Table S4**.

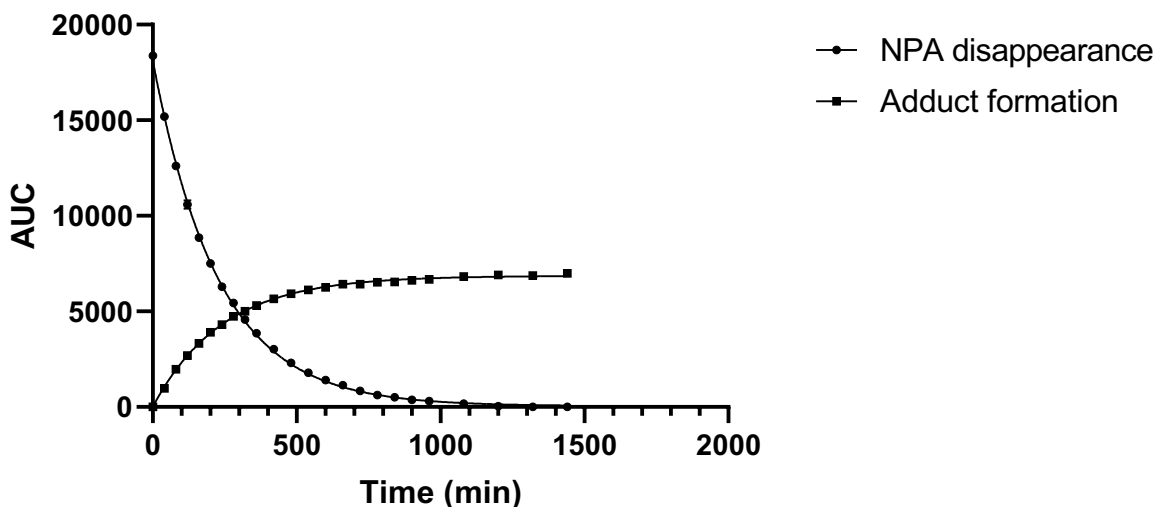

**Figure S17.** Plot of disappearance of NPA (1 mM) and formation of adduct for the addition of 1e (10 mM) vs time (min) in 67 mM CHES buffer (1% v/v DMSO), pH 9.0,  $\mu = 0.075$ ,  $T = 22^\circ\text{C}$ . The area under the curve (AUC) was integrated from the chromatograph at 214 nm for the peaks corresponding to NPA and the adduct. The AUC data for disappearance of NPA were fitted to a mono-exponential decay with the constraint that the plateau = 0 and the data for formation of adduct were fitted to a mono-exponential association with the constraint that  $Y_0 = 0$  to afford the  $k_{\text{obs}}$  values summarized in **Table S4**.

**Table S5.** Observed rate constants ( $k_{\text{obs}}$ ), calculated second order rate constants ( $k_2^{\text{calc}}$ ), and corrected second order rate constants ( $k_2^{\text{corr}}$ ) for the addition of MPA (**1e**) to NPA at varying ionic strengths. Measurements were made in duplicate for both the disappearance of acrylamide and appearance of adduct. Errors represent the standard deviation of the replicate values.

| [KCl] (M) | $k_{\text{obs}}$ ( $\text{s}^{-1}$ ) | $k_2^{\text{calc}}$ ( $\text{M}^{-1}\text{s}^{-1}$ ) | $k_2^{\text{corr}}$ ( $\text{M}^{-1}\text{s}^{-1}$ ) |
|-----------|--------------------------------------|------------------------------------------------------|------------------------------------------------------|
| 0.050     | $0.0845 \pm 0.0032$                  | $0.00845 \pm 0.00032$                                | $0.177 \pm 0.007$                                    |
| 0.075     | $0.0707 \pm 0.0024$                  | $0.00707 \pm 0.00024$                                | $0.148 \pm 0.005$                                    |
| 0.100     | $0.0562 \pm 0.0017$                  | $0.00562 \pm 0.00017$                                | $0.118 \pm 0.004$                                    |

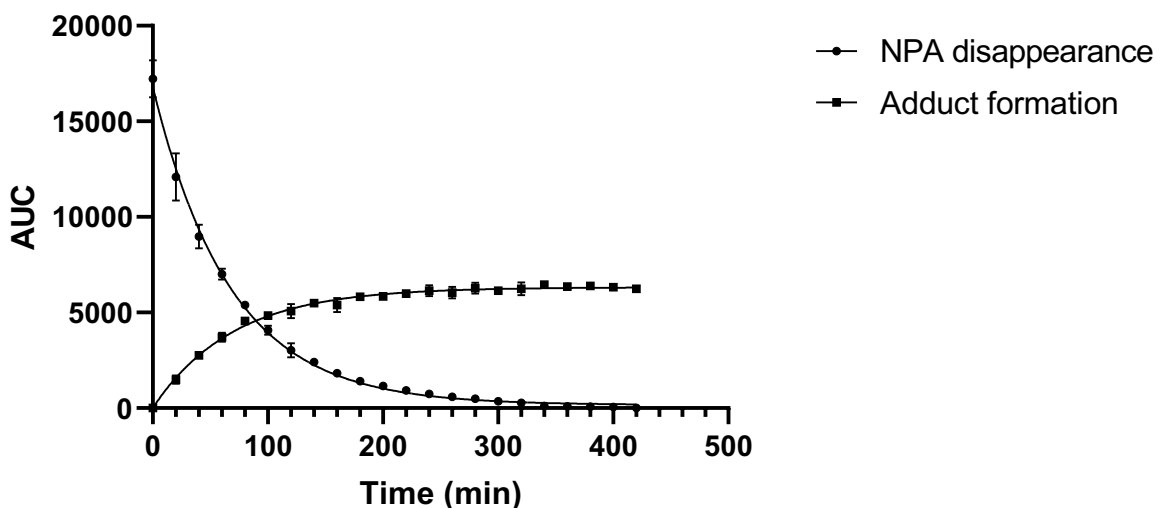

**Figure S18.** Plot of disappearance of NPA (1 mM) and formation of adduct for the addition of **1e** (10 mM) vs time (min) in carbonate buffer prepared in D<sub>2</sub>O (1% v/v ACN), pD = 9.7,  $\mu$  = 0.100, T = 22°C. The area under the curve (AUC) was integrated from the chromatograph at 214 nm for the peaks corresponding to NPA and the adduct. The AUC data for disappearance of NPA were fitted to a mono-exponential decay with the constraint that the plateau = 0 and the data for formation of adduct were fitted to a mono-exponential association with the constraint that  $Y_0 = 0$  to afford the  $k_{\text{obs}}$  values summarized in **Table S5**.

**Table S6.** Observed rate constants ( $k_{\text{obs}}$ ), calculated second order rate constants ( $k_2^{\text{calc}}$ ), corrected second order rate constants ( $k_2^{\text{corr}}$ ), and calculated solvent kinetic isotope effect ratio for the addition of MPA (**1e**) to NPA. Measurements were made in duplicate for both the disappearance of acrylamide and appearance of adduct. Errors represent the standard deviation of the replicate values.

| L <sub>2</sub> O | $k_{\text{obs}}$ (s <sup>-1</sup> ) | $k_2^{\text{calc}}$ (M <sup>-1</sup> s <sup>-1</sup> ) | $k_2^{\text{corr}}$ (M <sup>-1</sup> s <sup>-1</sup> ) | $k_2^{\text{corr,H}_2\text{O}}/k_2^{\text{corr,D}_2\text{O}}$ |
|------------------|-------------------------------------|--------------------------------------------------------|--------------------------------------------------------|---------------------------------------------------------------|
| H                | 0.0562 ± 0.0017                     | 0.00562 ± 0.00017                                      | 0.118 ± 0.004                                          | 1.09 ± 0.04                                                   |
| D                | 0.103 ± 0.003                       | 0.0103 ± 0.0003                                        | 0.108 ± 0.003                                          |                                                               |

Figure S19.  $^1\text{H-NMR}$  spectra of adduct formed on reaction of MPA with NPA in  $\text{D}_2\text{O}$ .

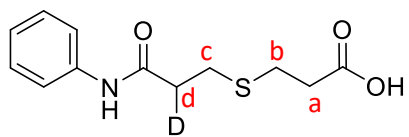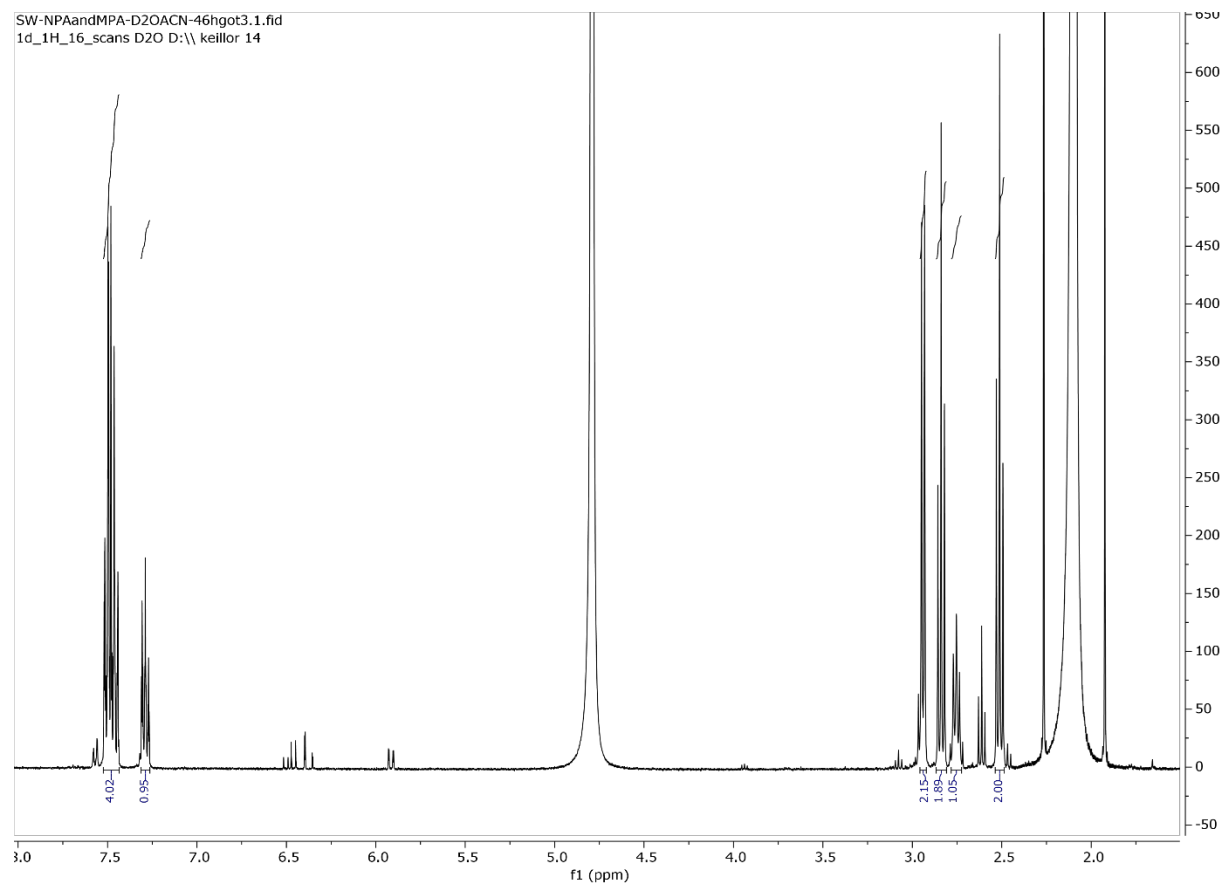



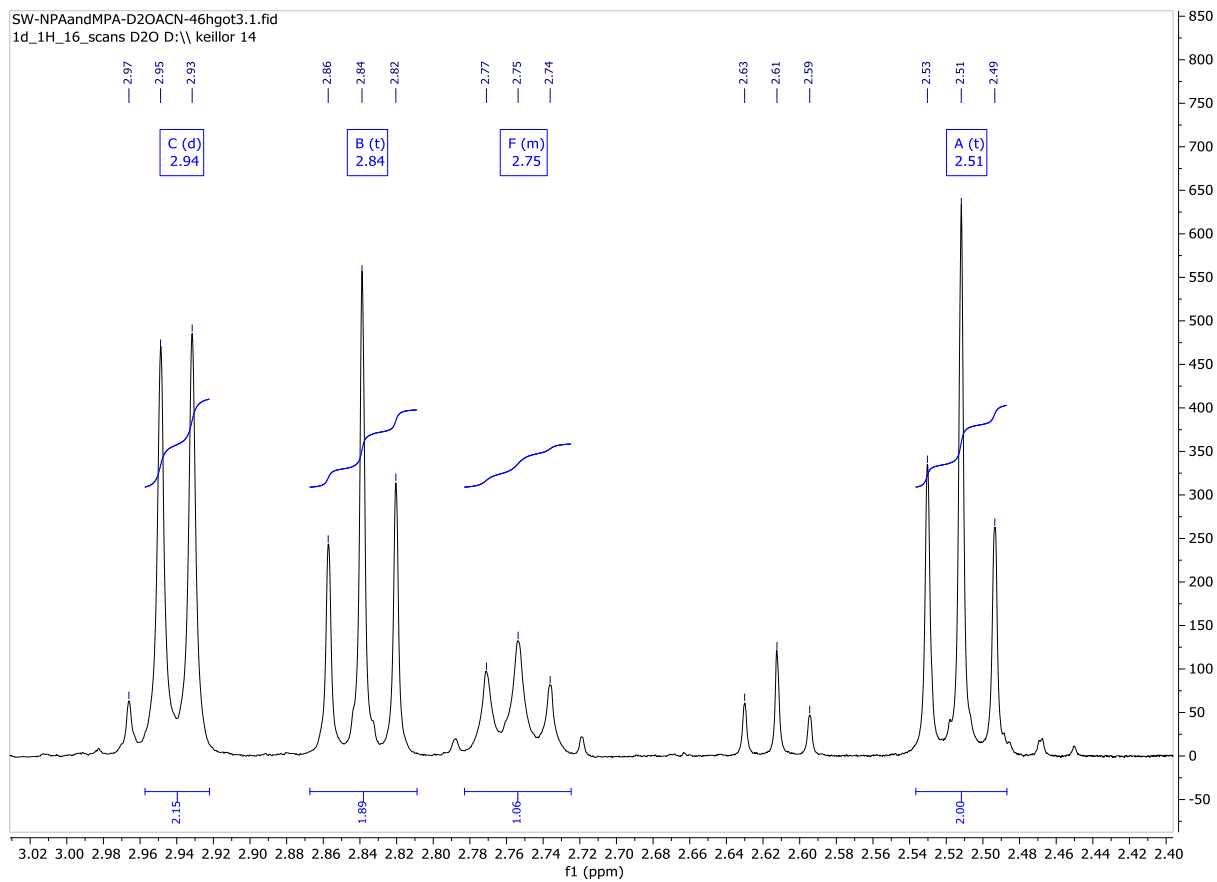

**Figure S20:** COSY spectrum of adduct formed on reaction of MPA with NPA in D<sub>2</sub>O.

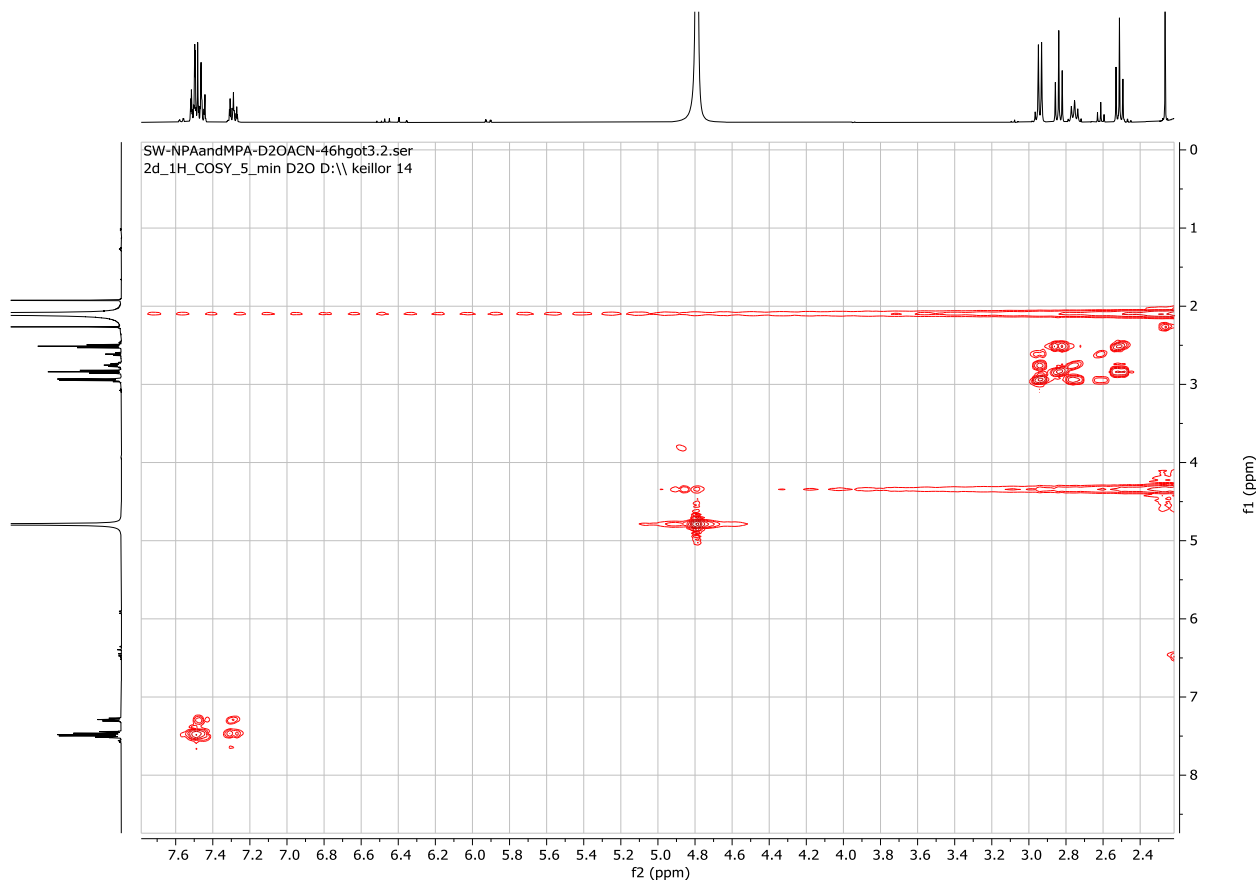

**Methanethiol (HF=-438.7161991, NImag=0)**

|   |           |           |           |
|---|-----------|-----------|-----------|
| C | -1.149875 | 0.019721  | 0.000000  |
| H | -1.521320 | -1.004113 | -0.000000 |
| H | -1.511252 | 0.526248  | -0.892471 |
| H | -1.511252 | 0.526248  | 0.892472  |
| S | 0.658342  | -0.087240 | 0.000000  |
| H | 0.909595  | 1.229124  | 0.000000  |

**Methanethiolate (HF=-438.2236907, NImag=0)**

|   |           |           |           |
|---|-----------|-----------|-----------|
| C | 0.000000  | 0.000000  | -1.122213 |
| H | 0.000000  | 1.015846  | -1.529501 |
| H | -0.879748 | -0.507923 | -1.529501 |
| H | 0.879748  | -0.507923 | -1.529501 |
| S | -0.000000 | -0.000000 | 0.707611  |

**N-Phenylacrylamide (HF=-478.3703966, NImag=0)**

|   |           |           |           |
|---|-----------|-----------|-----------|
| C | 3.611710  | -1.057555 | 0.511104  |
| H | 2.943491  | -1.687752 | 1.087579  |
| C | 3.196285  | 0.005129  | -0.163180 |
| H | 3.899237  | 0.636878  | -0.693779 |
| C | 1.799390  | 0.510568  | -0.209297 |
| O | 1.587295  | 1.701990  | -0.426736 |
| N | 0.824035  | -0.405284 | -0.009116 |
| H | 1.117902  | -1.369748 | 0.014188  |
| C | -0.569202 | -0.208055 | 0.010601  |
| C | -1.371784 | -1.312387 | -0.271567 |
| C | -1.162741 | 1.009409  | 0.331819  |
| C | -2.750400 | -1.199130 | -0.243131 |
| H | -0.905735 | -2.260536 | -0.513364 |

|   |           |           |           |
|---|-----------|-----------|-----------|
| C | -2.546679 | 1.111531  | 0.350031  |
| H | -0.553845 | 1.866461  | 0.572571  |
| C | -3.347123 | 0.016745  | 0.062630  |
| H | -3.360050 | -2.065916 | -0.465224 |
| H | -2.999592 | 2.062864  | 0.600122  |
| H | -4.425523 | 0.107605  | 0.080544  |
| H | 4.660775  | -1.326323 | 0.521009  |

**Transition State 1 (HF=-916.5980778,NImag=1)**

|   |           |           |           |
|---|-----------|-----------|-----------|
| C | -2.727797 | 0.851973  | -1.013713 |
| H | -2.207420 | 0.519948  | -1.900693 |
| C | -2.080776 | 1.625548  | -0.071959 |
| H | -2.644296 | 2.239193  | 0.619734  |
| C | -0.671971 | 1.542937  | 0.176270  |
| O | -0.045133 | 2.351146  | 0.892075  |
| N | -0.045223 | 0.455867  | -0.404303 |
| H | -0.680212 | -0.312430 | -0.619163 |
| C | 1.290990  | 0.078931  | -0.230859 |
| C | 1.581322  | -1.280803 | -0.108799 |
| C | 2.339597  | 0.998132  | -0.231149 |
| C | 2.891165  | -1.712022 | 0.018433  |
| H | 0.767313  | -1.997348 | -0.115973 |
| C | 3.646755  | 0.556727  | -0.090002 |
| H | 2.134338  | 2.051444  | -0.352629 |
| C | 3.933580  | -0.795304 | 0.036583  |
| H | 3.095901  | -2.771609 | 0.110617  |
| H | 4.451022  | 1.282407  | -0.090190 |
| H | 4.957278  | -1.130959 | 0.141980  |
| H | -3.791777 | 0.991548  | -1.148428 |

|   |           |           |           |
|---|-----------|-----------|-----------|
| S | -2.838250 | -1.464237 | -0.339721 |
| C | -2.390145 | -1.207362 | 1.385045  |
| H | -3.188602 | -1.511813 | 2.063776  |
| H | -1.480812 | -1.749675 | 1.651576  |
| H | -2.199425 | -0.135692 | 1.549347  |

**Enolate intermediate (HF=-916.609191, NImag=0)**

|   |           |           |           |
|---|-----------|-----------|-----------|
| C | -2.601821 | 0.459994  | -1.081563 |
| H | -2.048393 | 0.188402  | -1.985195 |
| C | -1.895894 | 1.449839  | -0.230996 |
| H | -2.480458 | 2.248619  | 0.209289  |
| C | -0.570338 | 1.377295  | 0.138317  |
| O | 0.058783  | 2.244058  | 0.834645  |
| N | 0.128672  | 0.214691  | -0.281346 |
| H | -0.456169 | -0.607736 | -0.336465 |
| C | 1.480567  | -0.049635 | -0.123602 |
| C | 1.888285  | -1.370192 | 0.101229  |
| C | 2.466167  | 0.935822  | -0.247493 |
| C | 3.230963  | -1.692528 | 0.203745  |
| H | 1.135427  | -2.145108 | 0.195617  |
| C | 3.806623  | 0.603379  | -0.128703 |
| H | 2.177516  | 1.957549  | -0.444550 |
| C | 4.204314  | -0.707698 | 0.097427  |
| H | 3.516719  | -2.723304 | 0.376383  |
| H | 4.551591  | 1.384189  | -0.227099 |
| H | 5.253808  | -0.958072 | 0.184410  |
| H | -3.566665 | 0.853870  | -1.401512 |
| S | -2.954386 | -1.214978 | -0.337209 |
| C | -3.749863 | -0.723380 | 1.198678  |
| H | -4.682050 | -0.191465 | 1.003308  |

|   |           |           |          |
|---|-----------|-----------|----------|
| H | -3.970368 | -1.629144 | 1.763181 |
| H | -3.085759 | -0.090825 | 1.788007 |

**Product (HF=-917.1271492,NImag=0)**

|   |           |           |           |
|---|-----------|-----------|-----------|
| C | -2.757135 | 0.311344  | 0.070894  |
| H | -2.799026 | 1.145112  | -0.630138 |
| C | -1.550151 | -0.562626 | -0.209756 |
| H | -1.593037 | -0.962891 | -1.227071 |
| C | -0.245318 | 0.195474  | -0.080425 |
| O | -0.199322 | 1.416489  | 0.009391  |
| N | 0.848269  | -0.603619 | -0.090987 |
| H | 0.661027  | -1.594797 | -0.121901 |
| C | 2.210508  | -0.263251 | -0.028946 |
| C | 2.691849  | 1.040777  | -0.119371 |
| C | 3.113842  | -1.317436 | 0.115218  |
| C | 4.059877  | 1.271217  | -0.058089 |
| H | 2.009627  | 1.866266  | -0.238488 |
| C | 4.473651  | -1.073221 | 0.172280  |
| H | 2.739930  | -2.332571 | 0.181382  |
| C | 4.957433  | 0.225991  | 0.088229  |
| H | 4.421606  | 2.289535  | -0.129489 |
| H | 5.158422  | -1.904509 | 0.284207  |
| H | 6.021472  | 0.418753  | 0.134341  |
| H | -2.709159 | 0.716287  | 1.082762  |
| S | -4.272549 | -0.664633 | -0.096759 |
| C | -5.479475 | 0.620649  | 0.266039  |
| H | -5.409606 | 1.433236  | -0.457341 |
| H | -6.468835 | 0.169222  | 0.196771  |
| H | -5.338681 | 1.012155  | 1.273723  |
| H | -1.526752 | -1.421752 | 0.464744  |
